# Supplementary material for: Activity of BET-proteolysis targeting chimeric (PROTAC) compounds in triple negative breast cancer
Source: PubMed Central journal article supplement (PMC6717344; doi:10.1186/s13046-019-1387-5), 2019-08-30
Supplement: 13046_2019_1387_MOESM1_ESM.pdf [file 13046_2019_1387_MOESM1_ESM.pdf]

| <b>Reagent</b>                                                                                            | <b>Obtained by:</b>                               |
|-----------------------------------------------------------------------------------------------------------|---------------------------------------------------|
| Dulbecco's Modified Eagle's Medium (DMEM)                                                                 | Gibco (Thermofisher)                              |
| Roswell Park Memorial Institute's Medium (RPMI)                                                           | Sigma-Aldrich                                     |
| JQ1 and OTX-025 (BET inhibitors)                                                                          | Selleckchem (Houston, TX)                         |
| MZ1 and ARV-825 (PROTACs-BRD4)                                                                            | Tocris Bioscience (Bio-Techne R&D Systems, S.LU). |
| Dimetilsulfoxide (DMSO)                                                                                   | Fisher-Scientifics                                |
| Matrigel                                                                                                  | Sigma-Aldrich                                     |
| Propidium iodide/RNase staining solution                                                                  | Immunostep S.L., Salamanca, Spain                 |
| Annexin V-DT-634                                                                                          | Immunostep S.L., Salamanca, Spain                 |
| Bicinchoninic acid (BCA) protein assay kit                                                                | Sigma-Aldrich                                     |
| Polyvinylidene difluoride membranes                                                                       | Millipore Corporation, Bedford, MA                |
| Anti-cyclin B, anti-PARP, anti-Mcl1                                                                       | Santa Cruz Biotechnology, USA                     |
| Anti-p(Y15) CDK1, anti-p27, anti-pH2AX, anti-Wee1, anti-p21, anti-BRD2, anti-BRD4, anti-cleaved caspase 3 | Cell Signalling Technologies, Beverly, MA, USA    |
| Anti-pHistone H3                                                                                          | Millipore Corporation                             |
| Anti-Calnexin                                                                                             | Stressgen Bioreagents, Canada                     |

| <b>Instrument or software</b>              | <b>Obtained by:</b>                            |
|--------------------------------------------|------------------------------------------------|
| ECL Plus Western Blotting Detection System | GE Healthcare, Buckinghamshire, United Kingdom |
| Calculusyn 2.0 software                    | Biosoft, Ferguson, MO                          |
| Dispomix                                   | L&M Biotech, Holly Springs, NC, USA            |
| FACSCanto™ II flow cytometer               | BDBiosciences                                  |
| Multiwell plate reader                     | BMG labtech                                    |
| SPSS version 22                            | IBM SPSS Statistics                            |
| GraphPad Prism version 5                   | GraphPad Software                              |

| <b>Buffer</b>                          | <b>Compounds</b>                                                                                                                                                                                      |
|----------------------------------------|-------------------------------------------------------------------------------------------------------------------------------------------------------------------------------------------------------|
| Annexin binding buffer                 | 10 mM HEPES, pH 7.4, 140 mM NaOH, 2.5 mM CaCl <sub>2</sub>                                                                                                                                            |
| Caspase reaction buffer                | 50 mmol/L HEPES pH 7.4, 300 mmol/L NaCl, 2 mmol/L EDTA, 0.2% CHAPS, 20% sucrose, 20 mmol/L dithreitol (DTT) and 10 mmol/L substrate caspase Ac-DEVD-AFC                                               |
| Tris-buffered saline with Tween (TBST) | 100 mM Tris [pH 7.5], 150 mM NaCl, 0.05% Tween 20                                                                                                                                                     |
| Lysis buffer                           | 20 mM Tris-HCl [pH 7.0], 140 mM NaCl, 50 mM EDTA, 10% glycerol, 1% Nonidet P-40, 1 μM pepstatin, 1 μg/mL aprotinin, 1 μg/mL leupeptin, 1 mM phenylmethyl sulfonyl fluoride, 1 mM sodium orthovanadate |
