# Supplementary material for: Activity of BET-proteolysis targeting chimeric (PROTAC) compounds in triple negative breast cancer
Source: Springer Nature journal article supplement (doi:10.1186/s13046-019-1387-5), 2019-08-30

**A**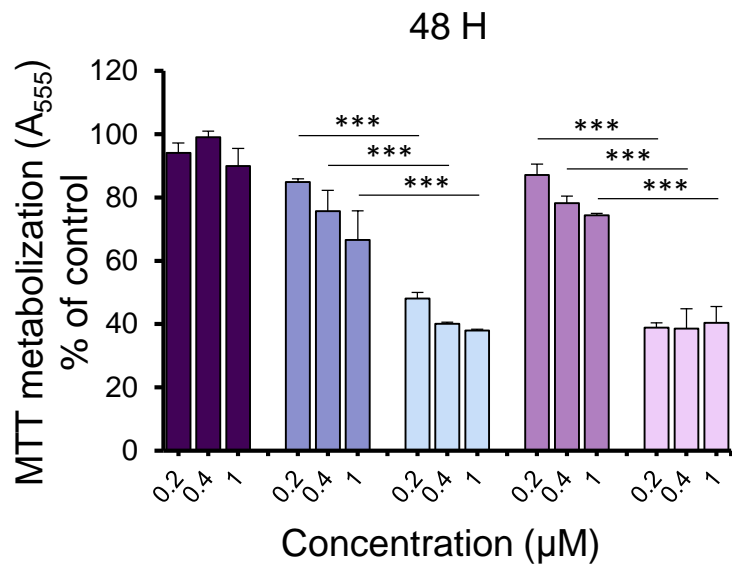

BT549

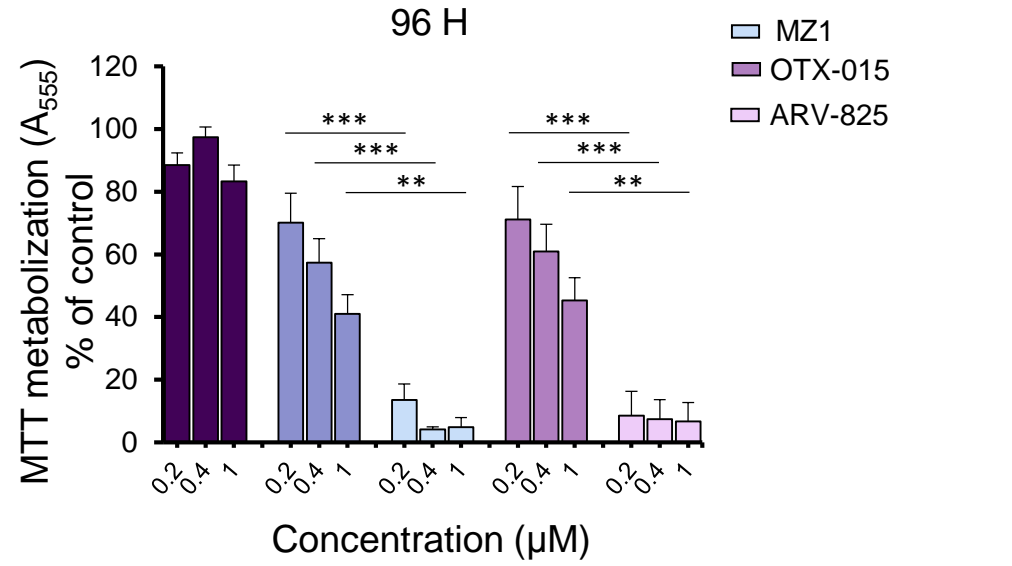**B**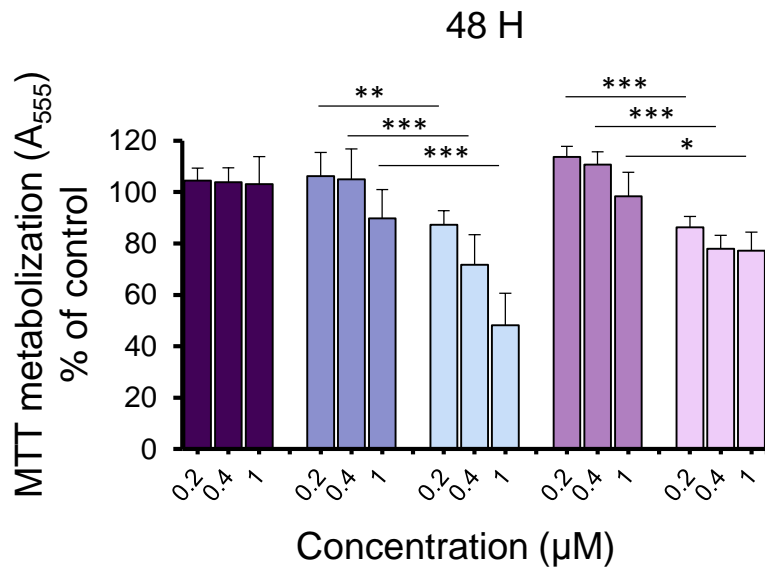

OVCAR3

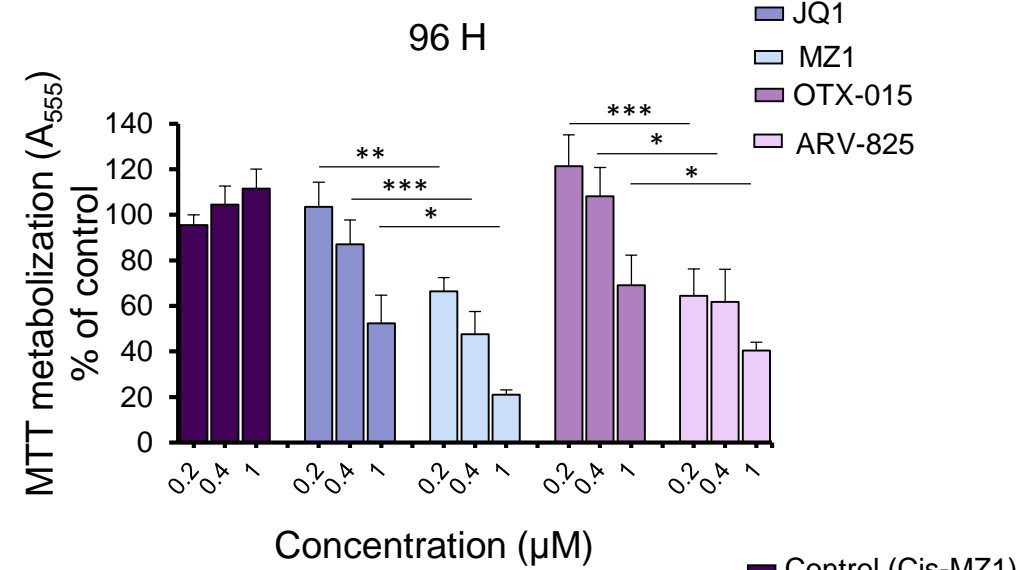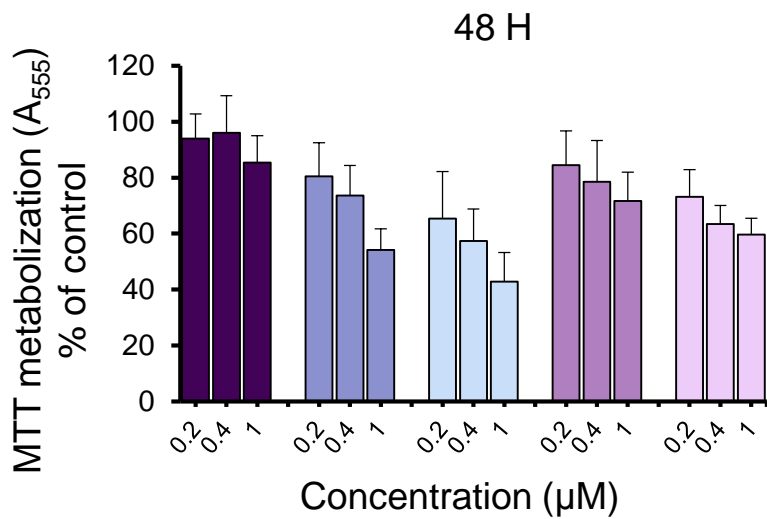

SKOV3

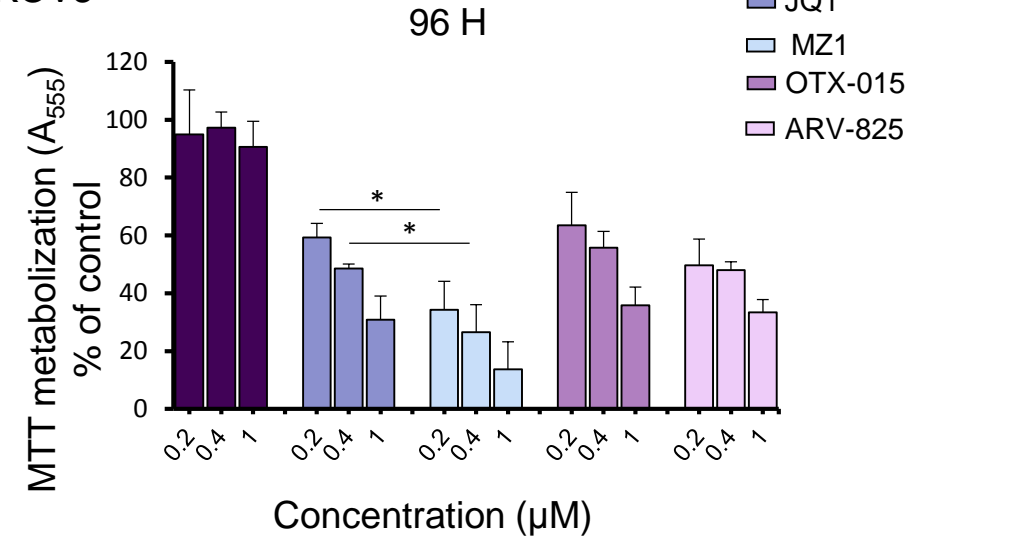

Supplement: MOESM2 [file 17123000]
